# Supplementary material for: Neuronal and Astroglial Localization of Glucocorticoid Receptor GRα in Adult Zebrafish Brain (Danio rerio)
Source: MDPI journal article supplement (doi:10.3390/brainsci13060861), 2023-05-26
Supplement: s1 [file s1]

**Supplementary Table S1.** Antibodies and their concentrations used.

| <b>Antibody</b>                                | <b>Source</b>                                              | <b>Host species</b> | <b>Dilution</b>                               |
|------------------------------------------------|------------------------------------------------------------|---------------------|-----------------------------------------------|
| GR $\alpha$ rabbit polyclonal antibody         | (Santa Cruz Biotechnology, Cat# sc-1002, RRID: AB_2155788) | Rabbit              | 1:100 in PBS with 0.5% Triton X-100           |
| $\alpha$ - tubulin antibody                    | (Sigma-Aldrich Cat# T5168, RRID: AB_477579)                | Mouse               | 1:6000 in TBS-Tween with 2% nonfat dried milk |
| monoclonal anti-TH antibody                    | (Chemicon, Cat# MAB318, RRID: AB_2201528)                  | Mouse               | 1:1000 in PBS with 0.5% Triton X-100          |
| monoclonal anti-GFAP antibody                  | (Sigma, clone G-A-5 Cat# G3893, RRID: AB_477010)           | Mouse               | 1:1000 in PBS with 0.5% Triton X-100          |
| polyclonal anti- v-GLUT antibody               | (Millipore, Cat# MAB5504, RRID: AB_2187552)                | Mouse               | 1:1000 in PBS with 0.5% Triton X-100          |
| monoclonal antibody against anti- $\beta$ 2-AR | (Santa Cruz, Cat# sc-81577, RR11E1, RRID:AB_1119478)       | Mouse               | 1:300 in PBS with 0.5% Triton X-100           |

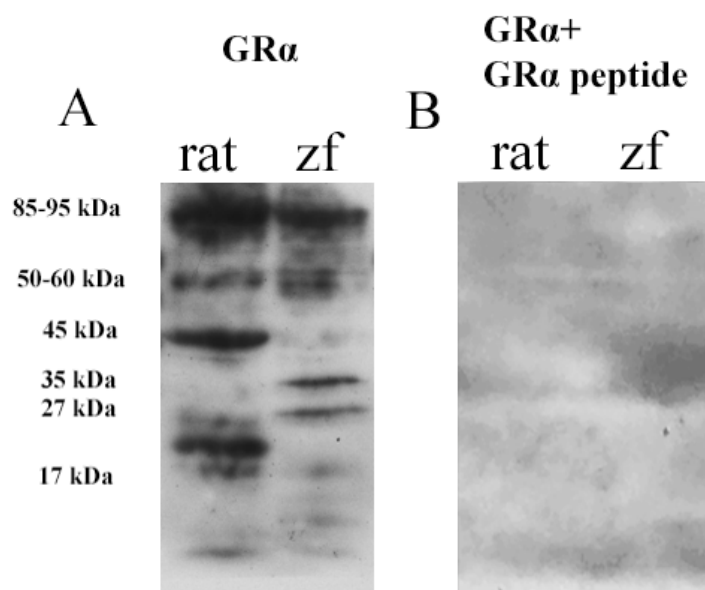

**Supplementary Figure S1.** Western immunoblot experiments to compare the migration of the  $GR\alpha$  immunoreacting proteins in mammalian and teleostean brains.
